# Supplementary material for: Trichoderma Strains and Metabolites Selectively Increase the Production of Volatile Organic Compounds (VOCs) in Olive Trees
Source: PubMed Central journal article supplement (PMC8066342; doi:10.3390/metabo11040213), 2021-03-31
Supplement: metabolites-11-00213-s001.pdf [file metabolites-11-00213-s001.pdf]

## Supplementary materials

**Table S1.** Parameters used to validate the relative-quantification method of the VOCs produced by olive trees following the application of *Trichoderma* strains or metabolites. Data include compound name (VOC), retention time (Rt, min), calibration curve and R<sup>2</sup>, limits of detection and quantification (LOD and LOQ, respectively), Intraday and Interday repeatability expressed as relative standard deviation (RSD %) on 3 replicates (n=3).

| VOC                             | Rt (min) | Calibration curve    | R <sup>2</sup> | LOD  | LOQ   | Intraday RSD% (n = 3) | Interday RSD% (n = 3) |
|---------------------------------|----------|----------------------|----------------|------|-------|-----------------------|-----------------------|
| Hexanol, 2-ethyl                | 7.6      | $y = 4,9x + 5,4$     | 0.9988         | 3.00 | 10.00 | 1.8                   | 2                     |
| Acetophenone                    | 8.2      | $y = 2x + 8$         | 1              | 3.00 | 10.00 | 0.7                   | 1                     |
| 4-Methyl-Benzaldehyde, 4-Methyl | 9.0      | $y = 1,15x + 0,9667$ | 0,9994         | 3.54 | 11.51 | 0.9                   | 1.2                   |
| Benzyl alcohol                  | 7.8      | $y = 1,25x + 1,4667$ | 0.995          | 3.00 | 10.00 | 2.1                   | 2.4                   |
| Copaene                         | 13.0     | $y = 0,7x + 0,2667$  | 0.9932         | 3.00 | 10.00 | 0.5                   | 1.0                   |
| Cumyl alcohol                   | 9.15     | $y = 1,05x - 0,1667$ | 0.9643         | 3.06 | 10.18 | 1.4                   | 1.3                   |
| DMNT                            | 10.6     | $y = 6,75x - 0,3333$ | 0.9995         | 3.00 | 10.00 | 1.8                   | 1.7                   |
| Funebrene                       | 13.2     | $y = 2,45x + 0,0667$ | 0.9999         | 3.00 | 10.00 | 0.9                   | 1.2                   |
| Isophorone                      | 12.0     | $y = 2x - 1,2$       | 0.9709         | 3.04 | 10.15 | 1.7                   | 1.9                   |
| Limonene                        | 7.0      | $y = 2,25x + 0,3333$ | 0.9959         | 1.33 | 10.02 | 2.1                   | 2.4                   |
| Methyl benzoate                 | 9.8      | $y = 2,4x + 1,5333$  | 0.9977         | 3.00 | 10.00 | 1.1                   | 1.4                   |
| Methyl salicylate               | 10.4     | $y = 1,2x + 0,7667$  | 0.9977         | 3.00 | 10.00 | 1.3                   | 1.5                   |
| Muurolene                       | 18.8     | $y = 1,3x - 0,2$     | 0.9826         | 3.03 | 10.08 | 2.0                   | 1.8                   |
| Myrcene                         | 4.0      | $y = 5,75x - 3$      | 0.9514         | 3.07 | 10.25 | 2.0                   | 1.8                   |
| Nonanal                         | 10.5     | $y = 6,75x - 2,9333$ | 0,9702         | 3.04 | 10.15 | 0.9                   | 1.1                   |
| Nonane                          | 3.4      | $y = 1,3x + 0,7$     | 1              | 3.00 | 10.00 | 0.5                   | 0.7                   |
| Phenol                          | 4.6      | $y = 0,4x + 0,05$    | 0.9552         | 3.07 | 10.23 | 3.0                   | 2.5                   |
| Pinene                          | 3.6      | $y = 3,05x - 1,8333$ | 0.9748         | 3.04 | 10.13 | 1.5                   | 1.8                   |
| t-Ocimene                       | 7.15     | $y = 1,5x$           | 1              | 3.00 | 10.00 | 3.0                   | 2.7                   |

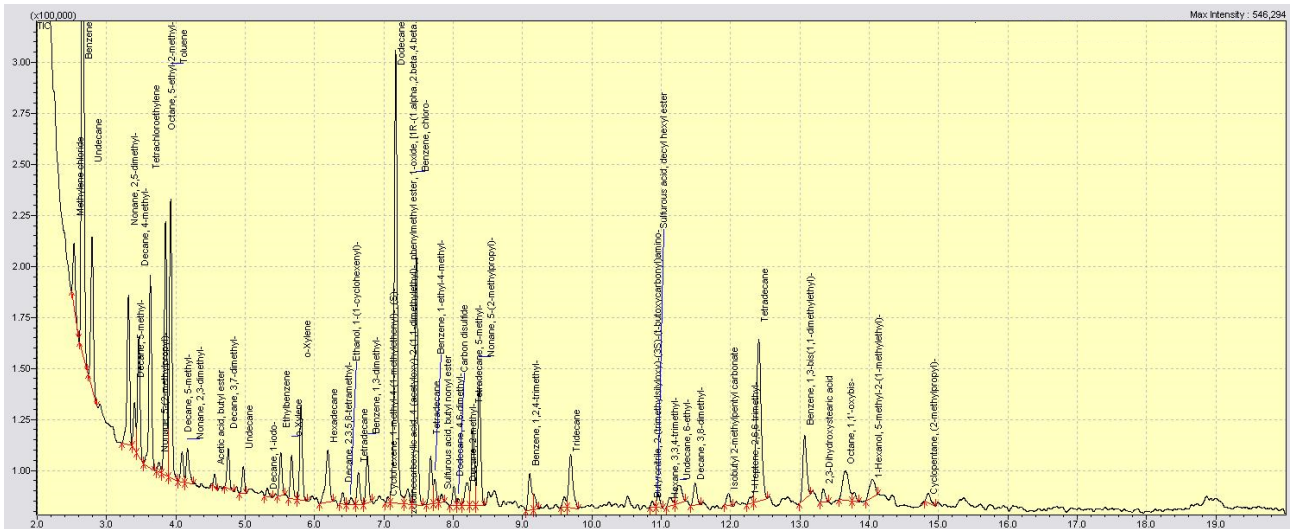

**Figure S1.** Example of an integrated gas chromatogram resulting from the extraction of plant VOCs sampled by Radiello® cartridges.

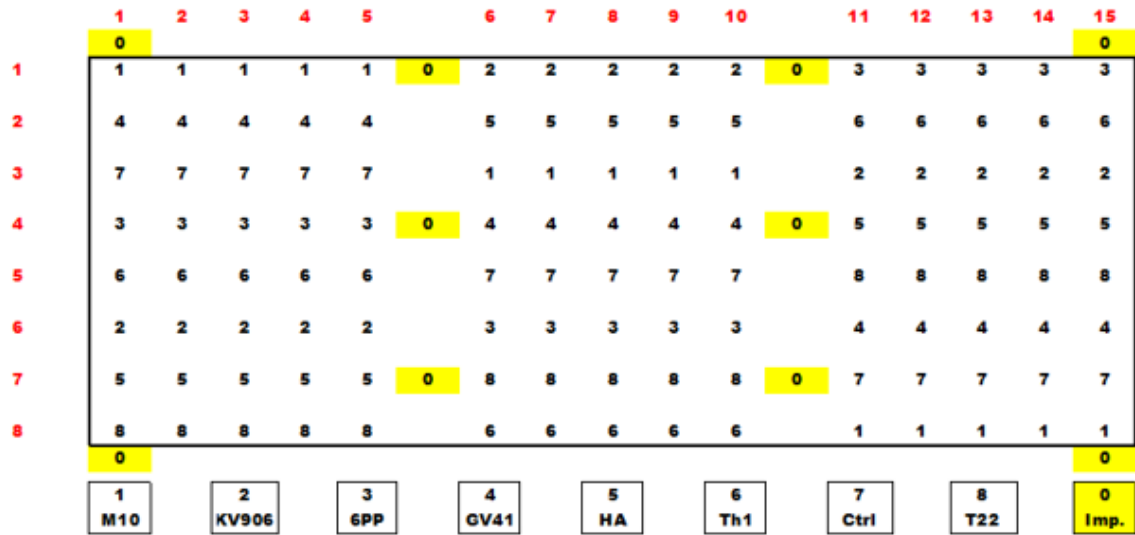

**Figure S2.** Randomized block design of field experiment. Treatments: *Trichoderma harzianum* strains M10, T22, and TH1, *T. asperellum* strain KV906, *T. virens* strain GV41, harzianic acid (HA) and 6-pentyl- $\alpha$ -pyrone (6PP). Numbers in the figure represent the treatments as indicated in the boxes below the scheme. The following parameters were used: N° of plants per treatment: 15; Plant layout: 1.30m x1.30m plant-plant; concentration of *Trichoderma* spore suspensions:  $1 \cdot 10^7$  spore/mL; concentration of *Trichoderma* metabolite solutions:  $1 \cdot 10^{-5}$  M.

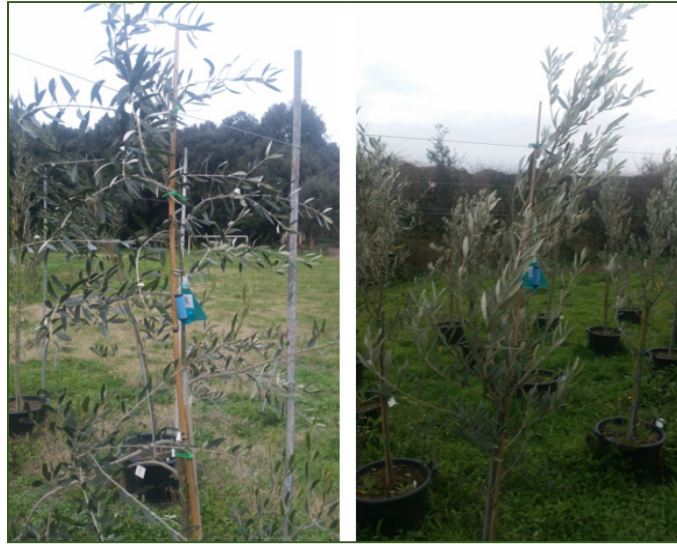

**Figure S3.** Application of the Radiello® cartridges to olive trees.
